Development 138, 4813 (2011) doi:10.1242/dev.075044  
© 2011. Published by The Company of Biologists Ltd

## Motoneurons are essential for vascular pathfinding

Amy H. Lim, Arminda Suli, Karina Yaniv, Brant Weinstein, Dean Y. Li and Chi-Bin Chien

There were errors published in *Development* **138**, 3847-3857.

Three morpholinos were incorrectly described in the materials and methods section Morpholino (MO) oligonucleotide injections. For the *olig2* and *robo4* MOs, the incorrect sequence was shown; in addition, the *olig2* MO was described as splice blocking instead of translation blocking. The *mtp* MO was incorrectly described as unpublished. Corrected information for these three MOs appears below.

The authors apologise to readers for these mistakes.

*olig2* translation-blocking MO: 5'-CGTTCAGTGCGCTCTCAGCTTCTCG-3'

*robo4* MO: 5'-TTTTTTAGCGTACCTATGAGCAGTT-3'

*mtp* MO: 5'-CGGCAACCGGCATCATGTTTGGG-3' (Schlegel and Stainier, 2006)

### Reference

Schlegel, A. and Stainier, D. Y. (2006). Microsomal triglyceride transfer protein is required for yolk lipid utilization and absorption of dietary lipids in zebrafish larvae. *Biochemistry* **45**, 15179-15187
